# Supplementary material for: Injury-induced cold sensitization in Drosophila larvae involves behavioral shifts that require the TRP channel Brv1
Source: PubMed Central journal article supplement (PMC6306221; doi:10.1371/journal.pone.0209577), 2018-12-26
Supplement: pone.0209577.s002.pdf [file pone.0209577.s002.pdf]

# COLD RESPONSES 24HRS POST UV AT GIVEN DOSE (10 °C)

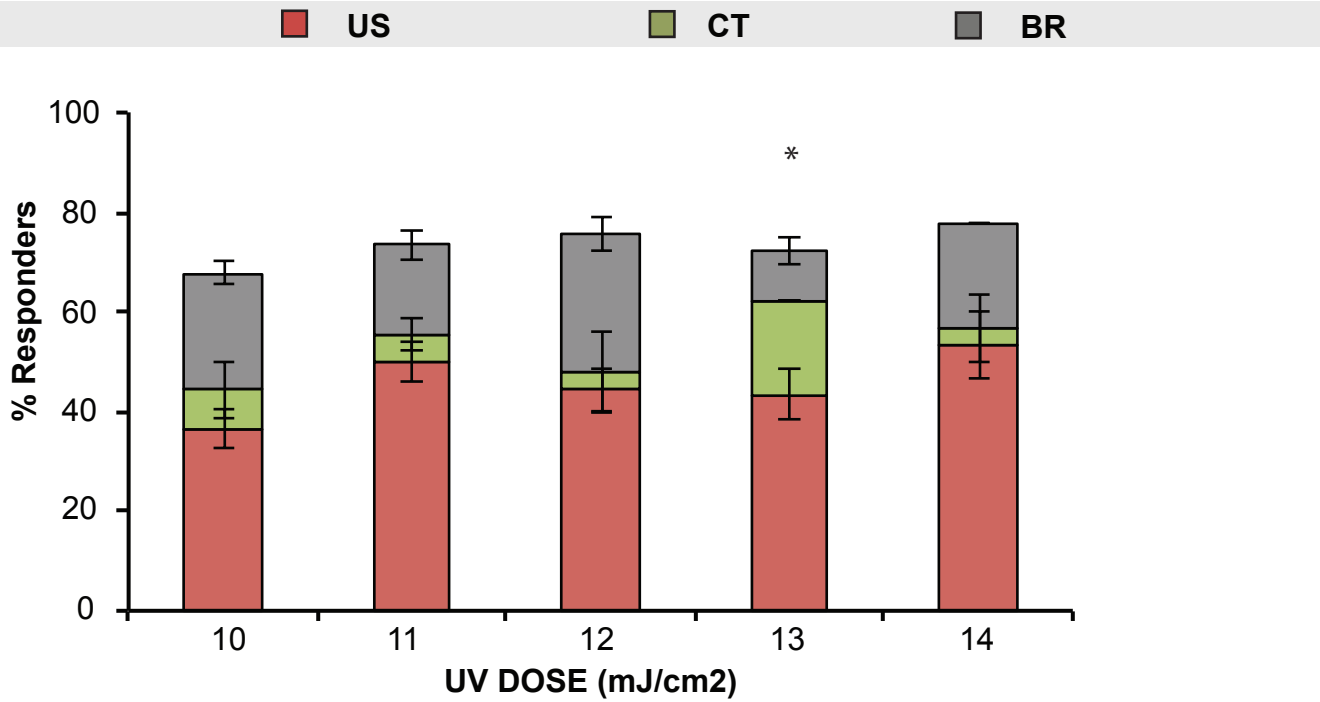

S2 Fig. Varying UV-dose has little effect on cold sensitization. Percent of responders to cold probe (10 °C) 24 hours after UV with varying dose (10-14 mJ/cm<sup>2</sup>). Bars represent average responders  $\pm$  s.e.m.. \* =  $p < 0.05$  by two-tailed Fisher's Exact test, comparing percent responders of each behavior between each UV dose, both US and BR were significantly different at 13 mJ/cm<sup>2</sup> when compared to other UV-doses  $n = 3$  sets of 30.
