# Supplementary material for: Injury-induced cold sensitization in Drosophila larvae involves behavioral shifts that require the TRP channel Brv1
Source: PubMed Central journal article supplement (PMC6306221; doi:10.1371/journal.pone.0209577), 2018-12-26
Supplement: pone.0209577.s003.pdf [file pone.0209577.s003.pdf]

## GCaMP response at 10°C

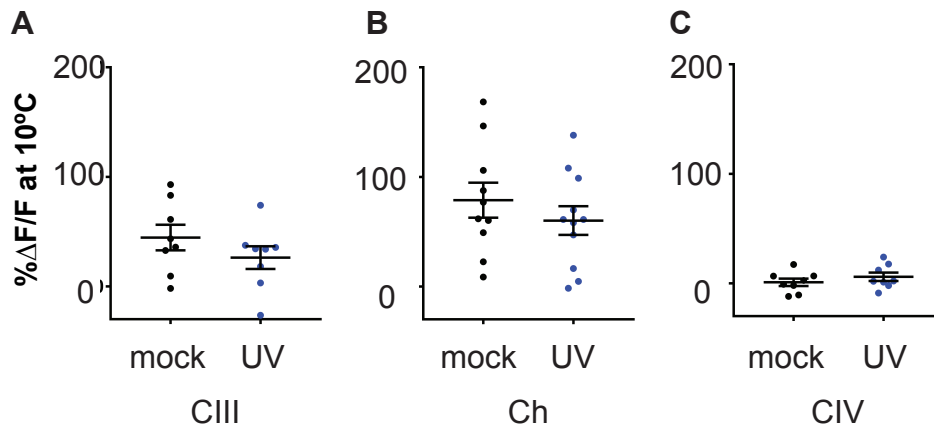

S3 Fig. UV irradiation does not alter cold-evoked calcium responses at 10°C. (A-C) Percent change in GCaMP6m fluorescence at 10°C for mock- and UV-treated larvae 24 hours post-irradiation for CIII (A), Ch (B), and CIV sensory neurons (C), where the middle line is mean  $\pm$  s.e.m. and  $n = 8-11$  larvae. Stats: Two-tailed t-test (A-C), where the comparisons are between mock and UV treated conditions. n.s. = not significant.
