# Supplementary material for: Injury-induced cold sensitization in Drosophila larvae involves behavioral shifts that require the TRP channel Brv1
Source: PubMed Central journal article supplement (PMC6306221; doi:10.1371/journal.pone.0209577), 2018-12-26
Supplement: pone.0209577.s004.pdf [file pone.0209577.s004.pdf]

■ US

■ CT

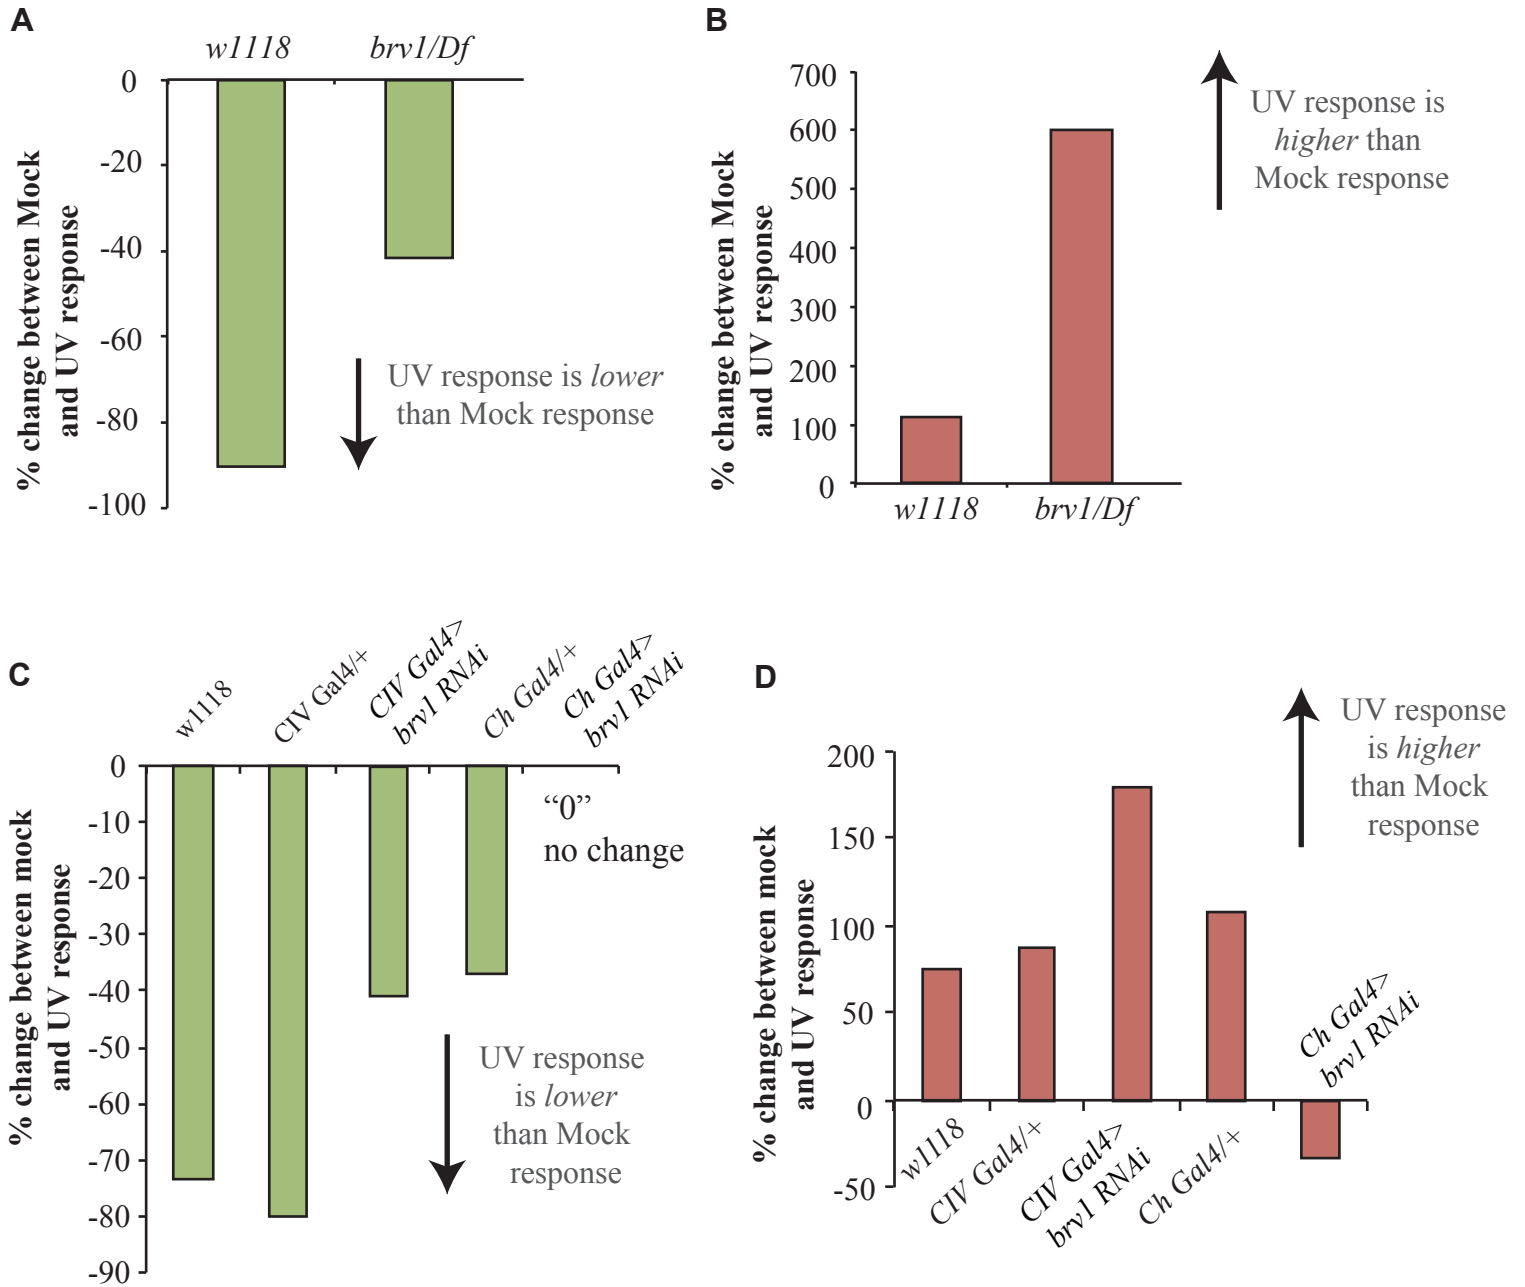

S4 Fig. Brv1 mutant and RNAi shown as percent change in response. (A) CT or (B) US, responses in wildtype (w1118) or Brv1 mutant larvae, shown as a percent change in response after UV. (C) CT or (D) US responses in larvae expressing Brv-RNAi in class IV (CIV) or Chordotonal (Ch) neurons, compared to genetic controls (w1118 and Gal4 alone). (A-C) Data is calculated as  $(\% \text{ UV responders} - \% \text{ mock responders}) / \% \text{ mock responders}$ . Therefore all bars that are above 1 indicate that the UV response was less than the mock response, and all bars below 1 indicate the UV response was more than the mock response, as indicated by arrows.
